# Supplementary material for: Neglecting Rice Milling Yield and Quality Underestimates Economic Losses from High-Temperature Stress
Source: PubMed Central journal article supplement (PMC3750041; doi:10.1371/journal.pone.0072157), 2013-08-22
Supplement: pone.0072157.s001.pdf [file pone.0072157.s001.pdf]

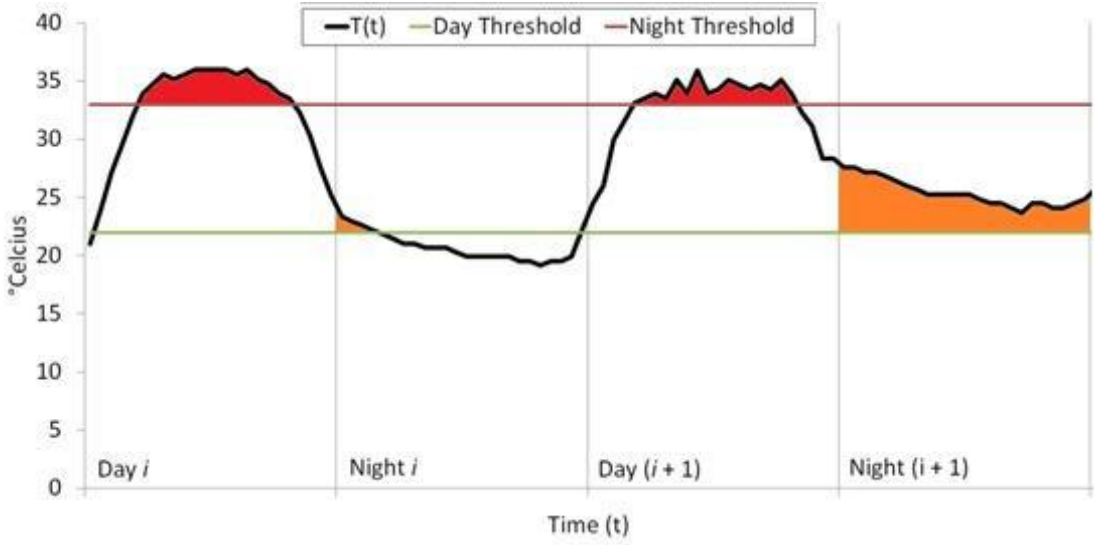

Figure S1. Visual approximation of exposure to high temperatures
